# Supplementary material for: Glecaprevir/Pibrentasvir Treatment in Liver or Kidney Transplant Patients With Hepatitis C Virus Infection
Source: PubMed Central journal article supplement — Hepatology. 2018 Jul 25;68(4):1298–307. doi: 10.1002/hep.30046 (PMC6220874; doi:10.1002/hep.30046), 2018-07-25
Supplement: HEP-68-1298-s001.pdf [file HEP-68-1298-s001.pdf]

Online supporting information:

**Glecaprevir/Pibrentasvir Treatment in Liver or Kidney Transplant Patients With  
Hepatitis C Virus Infection**

Nancy Reau, Paul Y. Kwo, Susan Rhee, Robert S. Brown, Jr., Kosh Agarwal,

Peter Angus, Ed Gane, Jia-Horng Kao, Parvez S. Mantry, David Mutimer,

K. Rajender Reddy, Tram T. Tran, Yiran B. Hu, Abhishek Gulati, Preethi Krishnan,

Emily O. Dumas, Ariel Porcalla, Nancy S. Shulman, Wei Liu, Suvajit Samanta, Roger Trinh,

Xavier Forns

**Contents**

|                                                                             |    |
|-----------------------------------------------------------------------------|----|
| 1. Eligibility Criteria                                                     | 3  |
| <i>1.1 Inclusion Criteria</i>                                               | 3  |
| <i>1.2 Exclusion Criteria</i>                                               | 5  |
| Supporting Table S1. Prevalence of Baseline Polymorphisms in NS3 and NS5A   | 8  |
| Supporting Table S2. Glecaprevir/pibrentasvir Efficacy in Patient Subgroups | 11 |
| Supporting Table S3. Serious Adverse Events                                 | 13 |
| Supporting Table S4. Immunosuppressant Medication Dosage Change             | 15 |

## 1. Eligibility Criteria

### 1.1 Inclusion Criteria

- Male or female at least 18 years of age at time of screening.
  - If female, patient must have been either postmenopausal, *or* permanently surgically sterile, *or* practicing at least 1 approved method of birth control (for women of childbearing potential) starting day 1 through at least 30 days after the last dose of glecaprevir/pibrentasvir.
  - For male subjects, no contraception was required.
  - Females of childbearing potential must have had a negative serum pregnancy test result at screening, and a negative urine pregnancy test at day 1.
  - Females of non-childbearing potential (either postmenopausal or permanently surgically sterile) at screening did not require pregnancy testing.
- Screening laboratory result indicating hepatitis C virus (HCV) genotype (GT) 1, 2, 3, 4, 5 or 6 infection.
- Positive anti-HCV antibody and plasma HCV RNA viral load  $\geq 1000$  IU/mL at screening visit.
- Chronic HCV infection defined as one of the following:
  - Positive for anti-HCV antibody or HCV RNA at least 6 months before screening.
  - A liver biopsy consistent with chronic HCV infection.
  - Abnormal alanine aminotransferase (ALT) levels for at least 6 months before screening.
- Patient must have been HCV treatment-naive (ie, had not received a single dose of any approved or investigational anti-HCV medication) or HCV treatment-experienced (ie, had failed prior treatment with interferon, pegylated interferon with or without ribavirin, or sofosbuvir with ribavirin with or without pegylated interferon), pre- or post-transplant.

- Previous HCV treatment must have been completed  $\geq 2$  months prior to screening.
- GT3 subjects must have been treatment-naïve.
- Body mass index of  $\geq 18.0$  kg/m<sup>2</sup> at the time of screening.
- Patients must have been documented as non-cirrhotic defined as meeting one of the following criteria:
  - A liver biopsy within 6 months prior to or during screening demonstrating the absence of cirrhosis, eg, a METAVIR, Batts-Ludwig, Knodell, IASL, Scheuer, or Laennec fibrosis score of  $\leq 3$ , Ishak fibrosis score of  $\leq 4$ .
  - A FibroScan<sup>®</sup> score of  $< 12.5$  kPa within 3 months of screening or during the screening period.
  - Patients with indeterminate FibroScan<sup>®</sup> score ( $12.5 \leq \text{score} < 14.6$ ), must have had a qualifying liver biopsy; or a screening FibroTest score of  $\leq 0.48$  and aspartate aminotransferase (AST) to platelet ratio index (APRI)  $< 1$ .
  - Patients with indeterminate FibroTest ( $0.48 < \text{result} < 0.75$ ), or conflicting FibroTest and APRI results (eg, FibroTest  $\leq 0.48$ , but APRI  $\geq 1$ ) must have had a qualifying liver FibroScan<sup>®</sup> or biopsy.
  - Liver biopsy results superseded Fibrotest<sup>®</sup>/APRI or FibroScan<sup>®</sup> results and were considered definitive.
  - FibroScan<sup>®</sup> results superseded Fibrotest<sup>®</sup>/APRI results for the determination of absence of cirrhosis.
- Patients voluntarily signed and dated an informed consent form, approved by an Institutional Review Board/Independent Ethics Committee prior to the initiation of any screening or study-specific procedures.
- Patients must have been able to understand and adhere to the trial visit schedule and all other protocol requirements.

- Recipient of a cadaveric or living donor liver transplant which was a consequence of HCV infection  $\geq 3$  months prior to screening, or patient received a cadaveric or living donor kidney  $\geq 3$  months before screening.
  - For patients with a history of hepatocellular carcinoma: patients in receipt of a cadaveric or living donor liver transplant  $\geq 3$  months prior to screening as a consequence of hepatocellular carcinoma in the setting of chronic HCV were eligible if there was not a clinical diagnosis of recurrent hepatocellular carcinoma post-liver transplant.
- Patients were currently taking a stable immunosuppressant regimen based on tacrolimus, sirolimus, everolimus, mycophenolate mofetil, azathioprine, cyclosporine and/or mycophenolic acid.
  - Corticosteroids such as prednisone or prednisolone were permitted as components of the immunosuppressant regimen providing the dose was no more than 10 mg/day at the time of screening.
  - Cyclosporine must have been at a maintenance dose of 100 mg or less per day.

### ***1.2 Exclusion Criteria***

- Female patient who was pregnant, breastfeeding or was considering becoming pregnant during the trial or for approximately 30 days after the last dose of glecaprevir/pibrentasvir.
- Recent (within 6 months prior to glecaprevir/pibrentasvir administration) history of drug or alcohol abuse that could preclude adherence to the protocol in the opinion of the investigator.
- Positive test result at screening for hepatitis B surface antigen or anti-human immunodeficiency virus antibody.

- HCV genotype performed during screening indicating co-infection with more than 1 HCV genotype or if HCV genotype was indeterminate.
- Requirement for and inability to safely discontinue the prohibited concomitant medications or supplements at least 2 weeks or 10 half-lives (whichever was longer) prior to the first dose of any glecaprevir/pibrentasvir.
- Clinically significant abnormalities, other than HCV infection, that made the patient an unsuitable candidate for the trial in the opinion of the investigator, including, but not limited to:
  - Active or suspected malignancy.
  - Uncontrolled cardiac, respiratory, gastrointestinal, hematologic, neurologic, psychiatric, metabolic, or other medical disease or disorder, which was unrelated to the existing HCV infection.
  - Uncontrolled diabetes as defined by a glycated hemoglobin (hemoglobin A1C) concentration >8.5% at the screening visit.
- Any cause of liver disease post transplantation other than chronic HCV infection including but not limited to the following:
  - Hemochromatosis.
  - Alpha-1 antitrypsin deficiency.
  - Wilson's disease.
  - Autoimmune hepatitis.
  - Alcoholic liver disease.
- Steatohepatitis on liver biopsy considered to be the primary cause of the liver disease rather than concomitant/incidental with HCV infection.
- Clinical history of fibrosing cholestatic hepatitis at any time post-transplant.
- Screening laboratory analyses showing any of the following abnormal laboratory results:

- ALT and AST  $>10 \times$  upper limit of normal (ULN).
  - Albumin  $<3.5$  g/dL.
  - Hemoglobin  $<10$  g/dL.
  - Platelets  $<70,000$ .
  - Calculated creatinine clearance (Cockcroft-Gault method) of  $<30$  mL/min.
  - Direct bilirubin  $>2$  mg/dL.
  - International Normalized Ratio  $>1.5$  ULN.
- Clinical history of acute renal failure in the 3 months prior to screening.
  - Re-transplantation of the liver or kidney.
  - Recipient of liver or kidney from a donor with known human immunodeficiency virus infection and/or hepatitis B surface antigen positive.
  - Steroid resistant rejection of the transplanted liver or kidney, or a history of rejection treated with high dose steroid within 3 months of screening.
  - History of post-transplant complications related to hepatic or renal vasculature.
  - Receipt of any investigational product within a time period equal to 10 half-lives of the product, if known, or a minimum of 6 weeks (whichever was longer) prior to glecaprevir/pibrentasvir administration.
  - Receipt of any other investigational or commercially available direct acting anti-HCV agents other than sofosbuvir (eg, telaprevir, boceprevir, simeprevir, paritaprevir, daclatasvir, ledipasvir, ombitasvir, elbasvir, or dasabuvir).
  - Consideration by the investigator, for any reason, that the patient was an unsuitable candidate to receive glecaprevir/pibrentasvir.
  - History of severe, life-threatening or other significant sensitivity to any excipients of the glecaprevir/pibrentasvir.
  - Patients who could not participate in the trial as per local law.

**Supporting Table S1.** Prevalence of Baseline Polymorphisms in NS3 and NS5A

| HCV<br>subtype* | NS3 <sup>†</sup>          |                      | NS5A <sup>†</sup>         |                      |
|-----------------|---------------------------|----------------------|---------------------------|----------------------|
|                 | Baseline<br>polymorphisms | % (n/N) <sup>‡</sup> | Baseline<br>polymorphisms | % (n/N) <sup>‡</sup> |
| <b>All GT1</b>  | <b>Any</b>                | <b>(0/56)</b>        | <b>Any</b>                | <b>19.6 (11/56)</b>  |
| 1a              | Any                       | (0/27)               | Any                       | 14.8 (4/27)          |
|                 |                           |                      | M28V                      | 3.7 (1/27)           |
|                 |                           |                      | H58L/P                    | 11.1 (3/27)          |
| 1b              | Any                       | (0/29)               | Any                       | 24.1 (7/29)          |
|                 |                           |                      | R30K/Q                    | 6.9 (2/29)           |
|                 |                           |                      | L31M                      | 3.4 (1/29)           |
|                 |                           |                      | P58S/T                    | 10.3 (3/29)          |
|                 |                           |                      | Y93H                      | 6.9 (2/29)           |
| <b>All GT2</b>  | <b>Any</b>                | <b>(0/13)</b>        | <b>Any</b>                | <b>83.3 (10/12)</b>  |
| 2a              | Any                       | (0/2)                | Any                       | 100 (2/2)            |
|                 |                           |                      | L31M                      | 100 (2/2)            |
| 2b              | Any                       | (0/9)                | Any                       | 75.0 (6/8)           |
|                 |                           |                      | M31L                      | 75.0 (6/8)           |
|                 |                           |                      | P58S                      | 12.5 (1/8)           |
| 2c              | Any                       | (0/1)                | Any                       | 100 (1/1)            |
|                 |                           |                      | R30K                      | 100 (1/1)            |



| HCV<br>subtype*        | NS3 <sup>†</sup>          |                      | NS5A <sup>†</sup>         |                      |
|------------------------|---------------------------|----------------------|---------------------------|----------------------|
|                        | Baseline<br>polymorphisms | % (n/N) <sup>‡</sup> | Baseline<br>polymorphisms | % (n/N) <sup>‡</sup> |
| 2i                     | Any                       | (0/1)                | Any                       | 100 (1/1)            |
|                        |                           |                      | F28L                      | 100 (1/1)            |
| 3a                     | Any                       | (0/24)               | Any                       | <b>20.8 (5/24)</b>   |
|                        |                           |                      | P58A/T                    | 8.3 (2/24)           |
|                        |                           |                      | Y93H                      | 12.5 (3/24)          |
| <b>All GT4</b>         | <b>Any</b>                | <b>(0/4)</b>         | <b>Any</b>                | <b>100 (4/4)</b>     |
| 4a                     | Any                       | (0/1)                | Any                       | 100 (1/1)            |
|                        |                           |                      | L30R                      | 100 (1/1)            |
| 4d                     | Any                       | (0/2)                | Any                       | 100 (2/2)            |
|                        |                           |                      | M31L                      | 50.0 (1/2)           |
|                        |                           |                      | T58P                      | 100 (2/2)            |
| 4r                     | Any                       | (0/1)                | Any                       | 100 (1/1)            |
|                        |                           |                      | I28M                      | 100 (1/1)            |
| 6a                     | Any                       | (0/2)                | Any                       | <b>100 (2/2)</b>     |
|                        |                           |                      | Q24R/K                    | 50.0 (1/2)           |
|                        |                           |                      | F28L                      | 100 (2/2)            |
| <b>GT1, 2, 3, 4, 6</b> | <b>Any</b>                | <b>(0/99)</b>        | <b>Any</b>                | <b>32.7 (32/98)</b>  |

\*HCV subtype was determined by phylogenetic analysis of NS3 and/or NS5A sequences.

<sup>†</sup>Amino acid positions included in the analysis: 155, 156, 168 in NS3; 24, 28, 30, 31, 58, 92,

93 in NS5A. “Any” indicates number of patients with polymorphisms at any of these amino acid positions.

‡“n” is the number of patients with polymorphism relative to subtype-specific reference sequence; “N” is the total number of patients with available sequence for that target.

**Supporting Table S2. Glecaprevir/pibrentasvir Efficacy in Patient Subgroups**

| <b>Patient or disease characteristic</b> | <b>SVR12 % (n/N; 95% CI)*</b> |
|------------------------------------------|-------------------------------|
| Overall                                  | 98.0 (98/100; 93.0–99.4)      |
| Sex                                      |                               |
| Male                                     | 97.3 (73/75; 90.8–99.3)       |
| Female                                   | 100 (25/25; 86.7–100)         |
| Age                                      |                               |
| <65 years                                | 98.6 (73/74; 92.7–99.8)       |
| ≥65 years                                | 96.2 (25/26; 81.1–99.3)       |
| Body mass index                          |                               |
| <30 kg/m <sup>2</sup>                    | 98.6 (72/73; 92.6–99.8)       |
| ≥30 kg/m <sup>2</sup>                    | 96.3 (26/27; 81.7–99.3)       |
| Baseline fibrosis stage                  |                               |
| F0–F1                                    | 97.5 (78/80; 91.3–99.3)       |
| F2                                       | 100 (6/6; ND)                 |
| F3                                       | 100 (14/14; 78.5–100)         |
| HCV genotype                             |                               |
| 1                                        | 100 (57/57; 93.7–100)         |
| 2                                        | 100 (13/13; 77.2–100)         |
| 3                                        | 91.7 (22/24; 74.2–97.7)       |
| 4                                        | 100 (4/4; ND)                 |
| 6                                        | 100 (2/2; ND)                 |

| Patient or disease characteristic               | SVR12 % (n/N; 95% CI)*  |
|-------------------------------------------------|-------------------------|
| HCV treatment experience                        |                         |
| Naïve                                           | 97.0 (64/66; 89.6–99.2) |
| Experienced                                     | 100 (34/34; 89.8–100)   |
| Interferon-based                                | 100 (32/32; 89.3–100)   |
| Sofosbuvir-based                                | 100 (1/1; ND)           |
| Pre-transplant                                  | 100 (24/24; 86.2–100)   |
| Post-transplant                                 | 100 (10/10; 72.2–100)   |
| Immunosuppressant medication type               |                         |
| Tacrolimus                                      | 98.5 (67/68; 92.1–99.7) |
| Cyclosporine                                    | 100 (13/13; 77.2–100)   |
| Other <sup>†</sup>                              | 94.7 (18/19; 75.4–99.1) |
| Presence of baseline polymorphisms <sup>‡</sup> |                         |
| None                                            | 100 (65/65)             |
| NS3-only                                        | —                       |
| NS5A-only                                       | 96.9 (31/32)            |
| NS3+NS5A                                        | —                       |

\*Intention-to-treat analysis. The 95% CIs were calculated using the Wilson's score method (ND for subgroups with <10 patients).

<sup>†</sup>Other category includes azathioprine, everolimus, mycophenolic acid, prednisolone, prednisone, and sirolimus.

<sup>‡</sup>Modified intention-to-treat analysis. Amino acid positions included in the analysis: 155, 156, and 168 in NS3; 24, 28, 30, 31, 58, 92, and 93 in NS5A.

CI, confidence interval; HCV, hepatitis C virus; ND, not done; SVR12, sustained virologic response at post-treatment week 12.

**Supporting Table S3. Serious Adverse Events**

| <b>Patient</b> | <b>Serious adverse event*</b>          | <b>Study day onset<sup>†</sup></b> | <b>Relationship to glecaprevir/pibrentasvir</b> |
|----------------|----------------------------------------|------------------------------------|-------------------------------------------------|
| 1              | Pyelonephritis                         | 23                                 | No reasonable possibility                       |
|                | Neutropenia                            | 43                                 | No reasonable possibility                       |
|                | Pyelonephritis                         | 112 (27)                           | No reasonable possibility                       |
| 2              | Groin infection                        | 42                                 | No reasonable possibility                       |
|                | Sepsis                                 | 42                                 | No reasonable possibility                       |
|                | Vascular pseudoaneurysm ruptured       | 42                                 | No reasonable possibility                       |
|                | Pneumonia                              | 87 (3)                             | No reasonable possibility                       |
|                | Sepsis                                 | 99 (15)                            | No reasonable possibility                       |
| 3              | Immunosuppressant drug level increased | 46                                 | No reasonable possibility                       |
|                | Liver function test increased          | 46                                 | No reasonable possibility                       |
|                | Renal impairment                       | 46                                 | No reasonable possibility                       |
| 4              | Respiratory tract infection            | 73                                 | No reasonable possibility                       |
| 5              | Urinary tract infection                | 15                                 | No reasonable possibility                       |
|                | Renal impairment                       | 18                                 | No reasonable possibility                       |
|                | Sepsis                                 | 46                                 | No reasonable possibility                       |
|                | Urinary tract infection                | 46                                 | No reasonable possibility                       |
|                | Renal failure                          | 85                                 | No reasonable possibility                       |
| 6              | Sinusitis                              | 2                                  | Reasonable possibility                          |

|   |                              |          |                           |
|---|------------------------------|----------|---------------------------|
| 7 | Cerebrovascular accident     | 50 (1)   | No reasonable possibility |
| 8 | Hepatic function<br>abnormal | 113 (29) | Reasonable possibility    |

\*MedDRA Preferred Term version 19.1.

†Numbers in parentheses indicate days since last dose of glecaprevir/pibrentasvir.

**Supporting Table S4.** Immunosuppressant Medication Dosage Change

| <b>Immunosuppressant medication dosage change, n (%)</b> | <b>Day 3</b> | <b>Week 1</b> | <b>Day 10</b> | <b>Week 2</b> | <b>Week 4</b> | <b>Week 6</b> | <b>Week 8</b> | <b>Week 12</b> |
|----------------------------------------------------------|--------------|---------------|---------------|---------------|---------------|---------------|---------------|----------------|
| <b>Cyclosporine</b>                                      |              |               |               |               |               |               |               |                |
| Increase                                                 | 2 (2)        | 1 (1)         | 0             | 2 (2)         | 2 (2)         | 2 (2)         | 2 (2)         | 1 (1)          |
| Decrease                                                 | 3 (3)        | 1 (1)         | 4 (4)         | 2 (2)         | 3 (3)         | 0             | 0             | 1 (1)          |
| <b>Sirolimus</b>                                         |              |               |               |               |               |               |               |                |
| Increase                                                 | 0            | 0             | 0             | 0             | 0             | 0             | 0             | 0              |
| Decrease                                                 | 0            | 0             | 0             | 0             | 0             | 0             | 0             | 0              |
| <b>Everolimus</b>                                        |              |               |               |               |               |               |               |                |
| Increase                                                 | 2 (2)        | 0             | 0             | 0             | 1 (1)         | 1 (1)         | 0             | 1 (1)          |
| Decrease                                                 | 0            | 0             | 0             | 2 (2)         | 2 (2)         | 0             | 2 (2)         | 2 (2)          |
| <b>Tacrolimus</b>                                        |              |               |               |               |               |               |               |                |
| Increase                                                 | 14 (14)      | 3 (3)         | 6 (6)         | 5 (5)         | 11 (11)       | 12 (12)       | 2 (2)         | 9 (9)          |
| Decrease                                                 | 9 (9)        | 10 (10)       | 7 (7)         | 15 (15)       | 11 (11)       | 6 (6)         | 10 (10)       | 9 (9)          |

Number and percentage of patients with immunosuppressant medication dosage change at each post-baseline visit during the glecaprevir/pibrentasvir treatment period (safety population, N = 100).
